# Supplementary material for: Kluyveromyces marxianus supplementation ameliorates alcohol-induced liver injury associated with the modulation of gut microbiota in mice
Source: Royal Society of Chemistry journal article supplement (doi:10.1039/d3fo01796f), 2023-01-01
Supplement: d3fo01796f1.xlsx [file d3fo01796f1.xlsx]

## Sheet: Bacteria at family level
ASV ID	CK1	CK2	CK3	CK4	CK5	CK6	EtOH1	EtOH2	EtOH3	EtOH4	EtOH5	EtOH6	Km1	Km2	Km3	Km4	Km5	Km6
p__Firmicutes; c__Bacilli; o__Erysipelotrichales; f__Erysipelotrichaceae	0.447518	0.304557	0.278689	0.475303	0.422505	0.352964	0.267681	0.287186	0.26252	0.273637	0.277454	0.29035	0.488239	0.480322	0.34483	0.355822	0.479482	0.485624
p__Firmicutes; c__Bacilli; o__Lactobacillales; f__Lactobacillaceae	0.0114444	0.0103296	0.0203944	0.0049151	0.00501655	0.0132881	0.158835	0.178435	0.10357	0.209842	0.220605	0.111303	0.199169	0.192548	0.10427	0.124281	0.0945082	0.116325
p__Firmicutes; c__Clostridia; o__Lachnospirales; f__Lachnospiraceae	0.0683865	0.113187	0.0923769	0.108904	0.0799164	0.0461041	0.0160077	0.0229824	0.00642163	0.0108727	0.00412421	0.0213064	0.0127619	0.0362398	0.0163425	0.0420805	0.00613773	0.00932196
p__Firmicutes; c__Bacilli; o__Bacillales; f__Bacillaceae	0.00514223	0.00091216	0.00223064	0.00203103	0.000313534	0.00597003	0.0143518	0.109753	0.059042	0.0102526	0.113941	0.0463146	0.0535397	0.0552385	0.0293768	0.0318871	0.0218195	0.0234635
p__Actinobacteriota; c__Coriobacteriia; o__Coriobacteriales; f__Eggerthellaceae	0.00752365	0.0192365	0.0112948	0.0281908	0.00916217	0.0096676	0.00541641	0.0036213	0.00625776	0.00282623	0.00258774	0.00485357	0.00747593	0.00324263	0.0191756	0.0337493	0.00700537	0.02568

## Sheet: Bacteria at genus level
ASV ID	CK1	CK2	CK3	CK4	CK5	CK6	EtOH1	EtOH2	EtOH3	EtOH4	EtOH5	EtOH6	Km1	Km2	Km3	Km4	Km5	Km6
p__Actinobacteriota; c__Coriobacteriia; o__Coriobacteriales; f__Atopobiaceae; g__Coriobacteriaceae_UCG-002	0.0490398	0.163455	0.118047	0.0428548	0.0145619	0.249047	0.19575	0.233498	0.199467	0.281456	0.277171	0.259419	0.155258	0.158549	0.177937	0.182828	0.222951	0.225722
p__Firmicutes; c__Bacilli; o__Erysipelotrichales; f__Erysipelotrichaceae; g__Allobaculum	0.302111	0.158767	0.161775	0.275733	0.276363	0.199168	0.0512661	0.0503063	0.118749	0.124768	0.131004	0.112414	0.199811	0.141243	0.19826	0.130293	0.094476	0.0910655
p__Firmicutes; c__Bacilli; o__Lactobacillales; f__Lactobacillaceae; g__Lactobacillus	0.0114444	0.0103296	0.0203944	0.0049151	0.00501655	0.0132881	0.158835	0.178435	0.10357	0.209842	0.220605	0.111303	0.199169	0.192548	0.10427	0.124281	0.0945082	0.116325
p__Firmicutes; c__Bacilli; o__Erysipelotrichales; f__Erysipelotrichaceae; g__Dubosiella	0.0597856	0.0893074	0.089863	0.0617434	0.0848284	0.0570812	0.0464707	0.0133271	0.03082	0.0494218	0.0137069	0.0337693	0.129507	0.0793878	0.0975289	0.0835403	0.089688	0.125324
p__Firmicutes; c__Clostridia; o__Monoglobales; f__Monoglobaceae; g__Monoglobus	0.00135525	0.00070971	0.00177035	0.001178	0.000313534	0.000924392	0.233113	0.0555206	0.0061355	0.198911	0	0.0289158	0.0192939	0.0183521	0.101217	0.150778	0.0793727	0.132423
p__Firmicutes; c__Bacilli; o__Bacillales; f__Bacillaceae; g__Bacillus	0.00514223	0.00091216	0.00223064	0.00203103	0.000313534	0.00597003	0.0143518	0.109753	0.059042	0.0102526	0.113941	0.0463146	0.0535397	0.0552385	0.0293768	0.0318871	0.0218195	0.0234635
p__Firmicutes; c__Clostridia; o__Lachnospirales; f__Lachnospiraceae; g__unclassified_f__Lachnospiraceae	0.04796	0.02943	0.0570407	0.0381834	0.0242466	0.0218773	0.00848686	0.008842	0.00256354	0.00972175	0.00307294	0.00921356	0.00970361	0.00842258	0.0293257	0.0321811	0.00408111	0.00855744

## Sheet: Fungi at family level
ASV ID	CK1	CK2	CK3	CK4	CK5	CK6	EtoH1	EtOH2	EtOH3	EtOH4	EtoH5	EtoH6	Km1	Km2	Km3	Km4	Km5	Km6
p__Ascomycota; c__Saccharomycetes; o__Saccharomycetales; f__Saccharomycetales_fam_Incertae_sedis	0.386819	0.147425	0.00124035	0.261721	0.406664	0.386913	0.277618	0.45823	0.289832	0.189753	0.449057	0.192269	0.0171157	0.219835	0.011783	0.00693169	0.288955	0.080741
p__Ascomycota; c__Saccharomycetes; o__Saccharomycetales; f__Saccharomycetaceae	0	0	0	0	0	0	0.000542488	0.00212	0.00097	0.0004351	0.000476105	0.00207497	0.0933083	0.54278	0.058219	0.555671	0.0790586	0.081352
p__Ascomycota; c__Sordariomycetes; o__Microascales; f__Ceratocystidaceae	0.0155491	0.0178545	0.0103363	0.0201244	0.0352797	0.0215298	0.0185415	0.0110575	0.0472365	0.0538329	0.0202196	0.0750763	0.0360258	0.0097561	0.0143281	0.0151512	0.00849598	0.0359454

## Sheet: Fungi at genus level
ASV ID	CK1	CK2	CK3	CK4	CK5	CK6	EtoH1	EtoH2	EtoH3	EtoH4	EtoH5	EtoH6	Km1	Km2	Km3	Km4	Km5	Km6
p__Ascomycota; c__Saccharomycetes; o__Saccharomycetales; f__Saccharomycetales_fam_Incertae_sedis; g__Candida	0.109861	0.416552	0.00124035	0.261721	0.406285	0.386913	0.277618	0.368502	0.389801	0.152531	0.449057	0.192269	0.0171157	0.0250963	0	0.00693169	0.288955	0.280406
p__Basidiomycota; c__Tremellomycetes; o__Cystofilobasidiales; f__Mrakiaceae; g__Tausonia	0.0101666	0.176212	0.216036	0.010402	0.00969622	0.116574	0.034913	0.128193	0.0387549	0.0159985	0.0280753	0.118479	0.0577518	0.0870603	0	0.0126134	0.278737	0.258468
p__Ascomycota; c__Eurotiomycetes; o__Eurotiales; f__Aspergillaceae; g__Penicillium	0.0561032	0.0626679	0.0552187	0.0536355	0.0572981	0.0535027	0.046308	0.0409461	0.0496888	0.0578399	0.0503386	0.0519505	0.0483933	0.0264121	0.0274657	0.0169883	0.0611481	0.0676085
p__Ascomycota; c__Saccharomycetes; o__Saccharomycetales; f__Saccharomycetaceae; g__Kluyveromyces	0	0	0	0	0	0	0	0.00187497	0.000174931	4.82851e-05	0	0.00207497	0.0933083	0.121791	0.512396	0.555671	0.0790586	0.11253
p__Ascomycota; c__Sordariomycetes; o__Microascales; f__Ceratocystidaceae; g__unclassified_f__Ceratocystidaceae	0.0155491	0.0178545	0.0103363	0.0201244	0.0352797	0.0215298	0.0185415	0.0110575	0.0472365	0.0538329	0.0202196	0.0750763	0.0360258	0.0097561	0.0143281	0.0151512	0.00849598	0.0359454
p__Ascomycota; c__Dothideomycetes; o__Pleosporales; f__Didymellaceae; g__Epicoccum	0.00068597	0.000302401	0.00107191	0	0.000895269	0	0.00172434	0.0297775	0	0.0162238	0.0283283	0	0.211848	0	0.147085	0	0	0.0615645
