# Supplementary material for: Kluyveromyces marxianus supplementation ameliorates alcohol-induced liver injury associated with the modulation of gut microbiota in mice
Source: Royal Society of Chemistry journal article supplement (doi:10.1039/d3fo01796f), 2023-01-01
Supplement: d3fo01796f2.xlsx [file d3fo01796f2.xlsx]

## Sheet: Organ indices 
Liver index (%)				Lung index (%)				Spleen index (%)				Kidney index (%)				Heart index (%)				Colon length (cm)
CK	EtOH	Km		CK	EtOH	Km		CK	EtOH	Km		CK	EtOH	Km		CK	EtOH	Km		CK	EtOH	Km
4.21505	5.14184	4.09408		0.60215	0.8422	0.5662		0.17204	0.39894	0.17422		1.41935	1.32979	1.39373		0.3871	0.62057	0.74042		5.8	6.4	5.8
3.51373	4.52117	4.91877		0.60582	0.69873	0.72202		0.28271	0.32881	0.36101		1.09047	1.27415	0.72202		0.52504	0.49322	0.76715		6.3	4.6	5.1
3.79069	4.87936	4.25432		0.61805	1.23324	0.84151		0.28842	1.12601	0.32726		1.2773	1.34048	1.07527		0.37083	0.69705	0.51426		7	3	4.3
4.19639	4.40348	4.29474		0.58749	1.02407	0.75789		0.33571	0.51203	0.29474		1.30088	1.43369	1.30526		0.67142	0.56324	0.92632		5.2	2.3	6.4
3.29365	4.92923	4.44952		0.43651	0.68326	1.1409		0.51587	0.53685	0.51341		1.66667	1.22011	1.42613		0.59524	0.53685	0.6275		5	5.8	4.8
3.85253	5.16926	4.67909		1.03563	0.68618	0.57971		0.57995	0.27447	0.28986		1.28418	1.23513	1.24224		0.53853	0.59469	0.5383		5.9	5.6	6.6
3.61596	4.52507	4.06808		0.87282	0.65226	0.99626		0.62344	0.3669	0.29058		1.41313	1.18223	1.16231		0.54032	0.44843	0.49813		5.5	--	6.4
3.98912	4.79926	4.16497		0.72529	0.59991	0.57166		0.31732	0.32303	0.3675		1.04261	1.10752	1.30666		0.63463	0.46147	0.69416		7.4		4.6
3.74251	--	4.32836		0.5988	--	1.04478		0.41168		0.44776		1.08533	--	1.59204		0.71108		0.64677		6.5		4.6
3.99645				0.62167				0.35524				1.15453	--			0.79929

## Sheet: ELISA
Hepatic IL-1β (ng/g prot)				Hepatic IL-6 (ng/g prot)				Hepatic TNF-α (ng/g prot)				CK	EtOH	Km
CK	EtOH	Km		CK	EtOH	Km		CK	EtOH	Km		CK	EtOH	Km
17.9907	26.9802	21.396		25.1471	27.0465	24.9873		333.336	314.478	320.779		220.877	229.237	205.598
18.7163	22.9129	23.6951		21.5832	26.7159	24.4609		336.176	278.302	373.283		218.058	284.134	250.455
18.3473	26.3344	20.0114		24.2124	26.3969	26.8164		334.26	306.432	338.349		214.014	218.018	190.961
18.5681	28.4388	23.0141		24.6063	27.1574	26.2435		342.374	307.975	330.208		219.182	247.475	217.027
--	24.44	21.67		23.66	26.9	26.73						213.76	265.43	197.09

## Sheet: Biochemical indexes
Hepatic GSH-Px (U/g prot)				Hepatic SOD (U/g prot)				Hepatic TG (μg/g)
CK	EtOH	Km		CK	EtOH	Km		CK	EtOH	Km
1866.11	1226.24	1803.58		23.1841	14.7039	17.3277		52.2517	66.9613	63.2786
1853.6	1313.08	1746.61		23.2008	16.7451	21.9308		53.4933	66.7298	64.2677
1800.8	1308.92	1757.03		21.6775	17.2319	16.4406		51.915	66.0143	64.3098
1854.99	1315.17	1744.53		23.8983	15.9647	19.1814		54.1877	66.8771	64.7938
Serum ALT (U/L)				Serum AST (U/L)				Hepatic CAT (U/mgprot)				Hepatic MDA (nmol/mgprot)				Hepatic MPO (U/g)
	value	error value			value	error value			value	error value			value	error value			value	error value
CK	18.6857	4.2		CK	47.4302	16.6		CK	72.214	3.45		CK	18.087	2.34		CK	0.44248	0.1
EtOH	26.0842	3.1		EtOH	97.9194	5.65		EtOH	57.6053	4.5		EtOH	26.8846	3.42		EtOH	1.09145	0.2
Km	22.9825	1.6		Km	51.0569	11.2		Km	66.9453	6.33		Km	23.4705	2.11		Km	0.961	0.08
