# Supplementary material for: Kluyveromyces marxianus supplementation ameliorates alcohol-induced liver injury associated with the modulation of gut microbiota in mice
Source: Royal Society of Chemistry journal article supplement (doi:10.1039/d3fo01796f), 2023-01-01
Supplement: d3fo01796f4.pdf [file d3fo01796f4.pdf]

## Supporting Information

# ***Kluyveromyces marxianus* supplementation ameliorates alcohol-induced liver injury associated with the modulation of gut microbiota in mice**

**Yuanyuan Cui<sup>1,2</sup>, Peng Guo<sup>1,2</sup>, Mengge Ning<sup>1,2</sup>, Yuan Yue<sup>4</sup>, Yahong Yuan<sup>1,2\*</sup>,  
Tianli Yue<sup>1,2,3\*</sup>**

<sup>1</sup> College of Food Science and Engineering, Northwest A&F University, Yangling, 712100, China;

<sup>2</sup> Laboratory of Quality & Safety Risk Assessment for Agro-products (YangLing), Ministry of Agriculture, Yangling, 712100, China;

<sup>3</sup> College of Food Science and Technology, Northwest University Xi'an, 710069, China

<sup>4</sup> Xi'an GaoXin No.1 High School, Xi'an, 710119, China

**\* Corresponding authors:**

Yahong Yuan E-mail: yyh324@126.com Tel: +86-29-87092261

Tianli Yue E-mail: yuetl305@nwafu.edu.cn Tel: +86-29-87092261

Institute: College of Food Science and Engineering, Northwest A&F University

Address: 22. Xi-nong Road, Yangling, Shaanxi, 712100, China.

## Supplementary materials

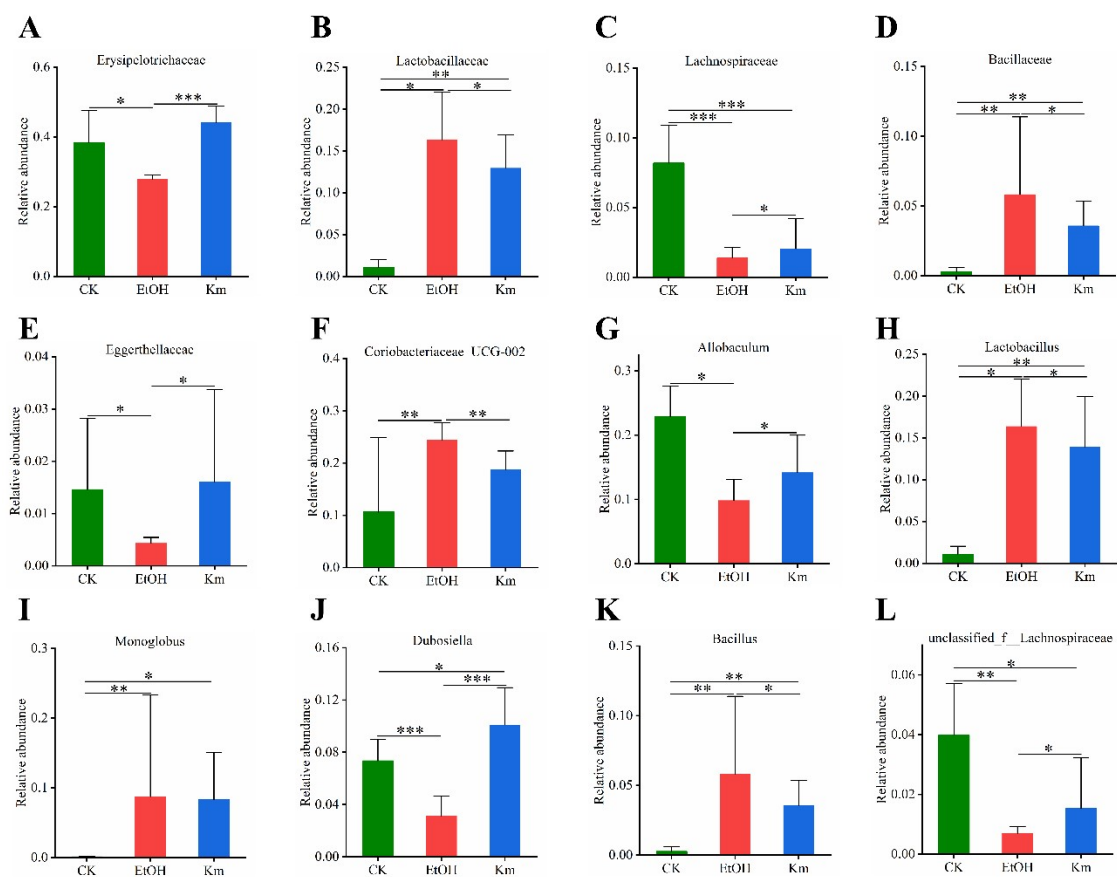

Figure S1 *K. marxianus* regulated specific gut bacterial microbiota. Relative abundance of (A) Erysipelotrichaceae, (B) Lactobacillaceae, (C) Lachnospiraceae, (D) Bacillaceae and (E) Eggerthellaceae at the family level. Relative abundance of (F) *Coriobacteriaceae*\_UCG-002, (G) *Allobaculum*, (H) *Lactobacillus*, (I) *Monoglobus*, (J) *Dubosiella*, (K) *Bacillus* and (L) *unclassified\_f\_Lachnospiraceae* at the genus level.  $n = 6$ ; Data are presented as mean  $\pm$  standard deviation (SD). \* $p < 0.05$ , \*\* $p < 0.01$ , \*\*\* $p < 0.001$  according to Wilcoxon rank sum test. CK, control fed mice; EtOH, ethanol fed mice; Km, ethanol + *K. marxianus* fed mice.

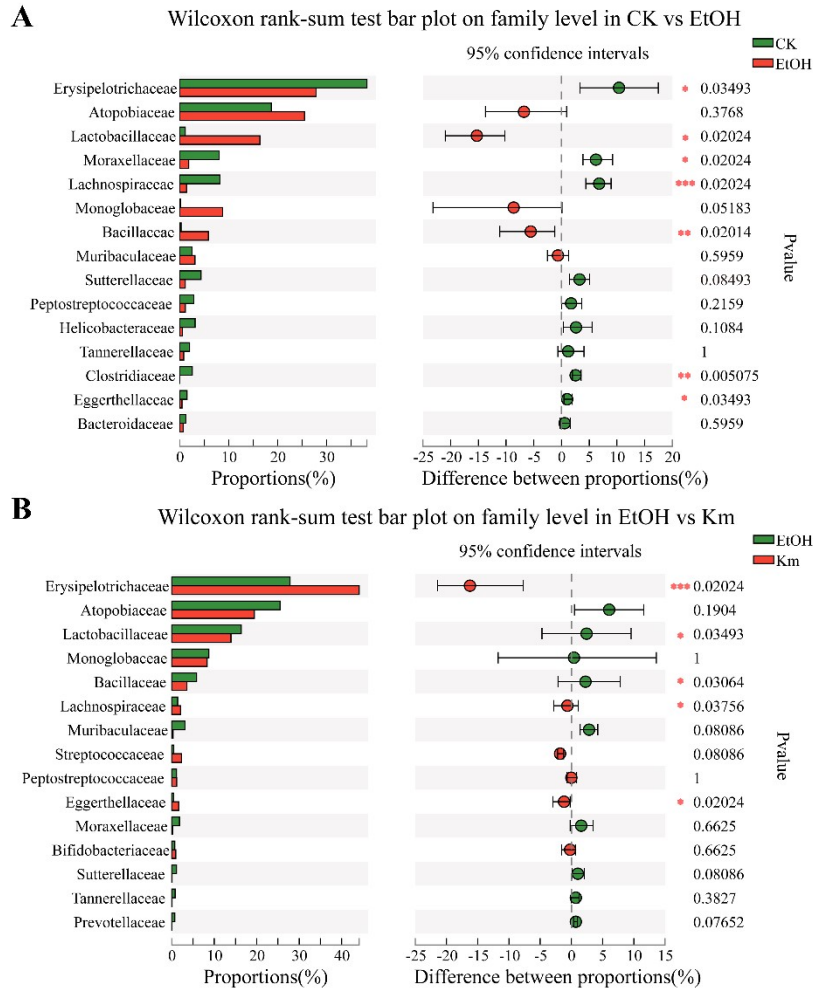

Figure S2 Variation analysis of gut bacterial microbiota on family level in CK vs EtOH (A) and EtOH vs Km (B) according to Wilcoxon rank sum test.  $n = 6$ ; \* $p < 0.05$ , \*\* $p < 0.01$ , \*\*\* $p < 0.001$ . CK, control fed mice; EtOH, ethanol fed mice; Km, ethanol + *K. marxianus* fed mice.

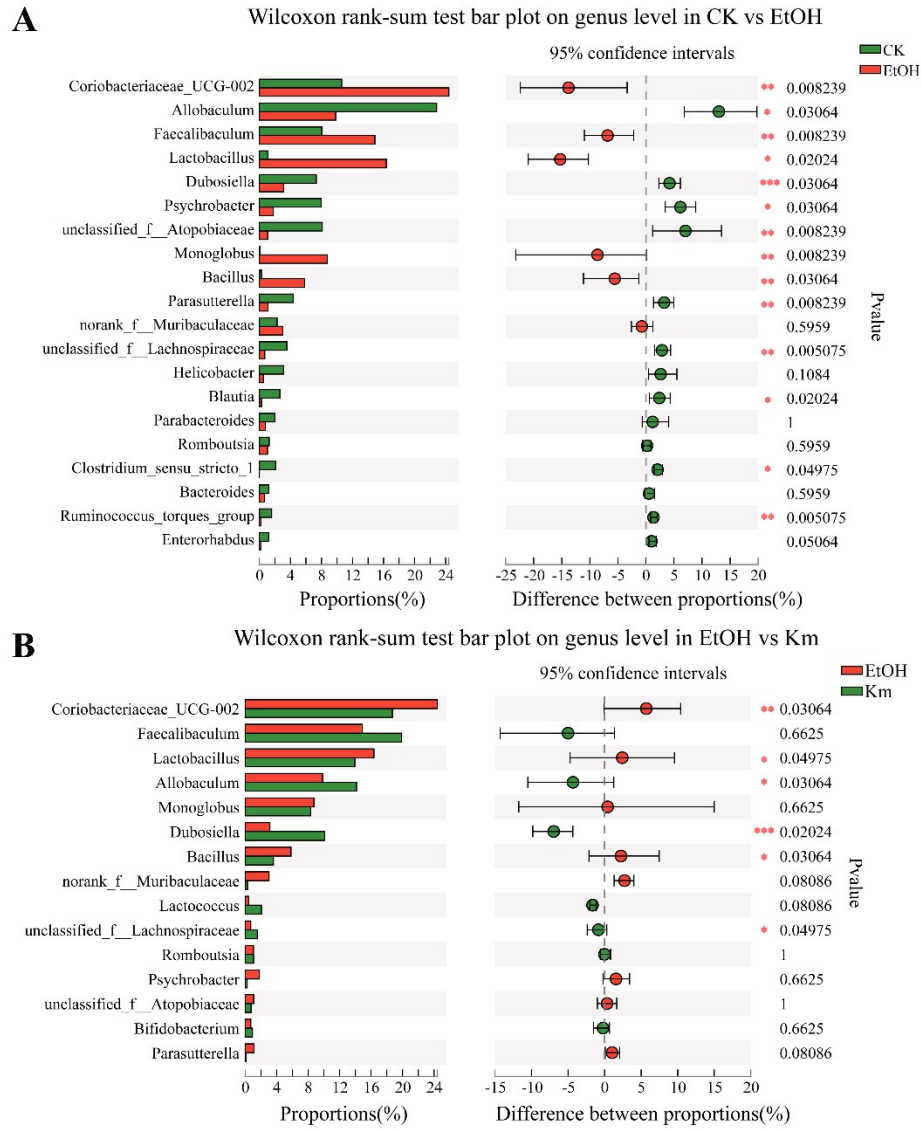

Figure S3 Variation analysis of gut bacterial microbiota on genus level in CK vs EtOH (A) and EtOH vs Km (B) according to Wilcoxon rank sum test. n = 6; \* $p < 0.05$ , \*\* $p < 0.01$ , \*\*\* $p < 0.001$ . CK, control fed mice; EtOH, ethanol fed mice; Km, ethanol + *K. marxianus* fed mice.

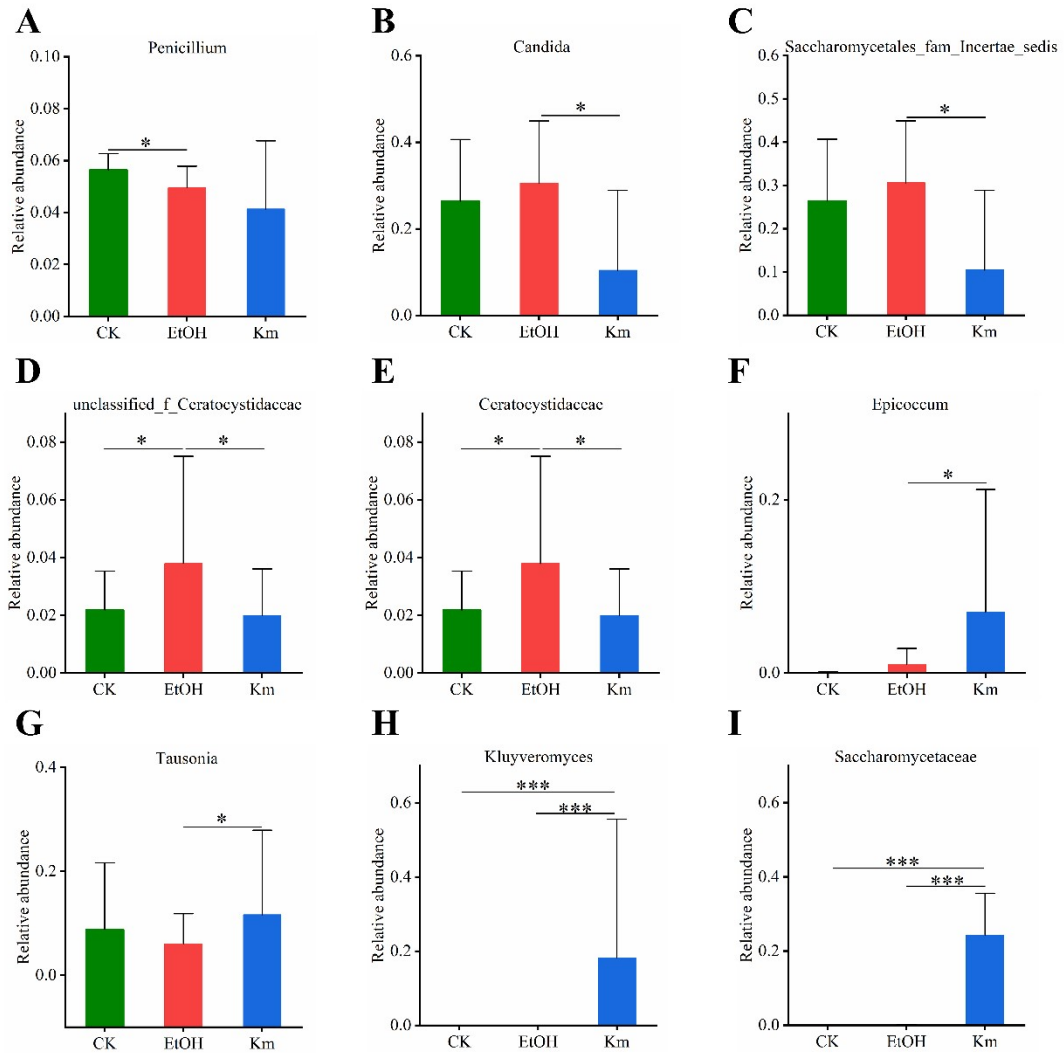

Figure S4 *K. marxianus* regulated specific gut fungal microbiota. Relative abundance of (A) *Penicillium*, (B) *Candida*, (C) *Saccharomycetales\_fam\_Incertae\_sedis*, (D) *unclassified\_f\_Ceratocystidaceae*, (E) *Ceratocystidaceae*, (F) *Epicoccum*, (G) *Tausonia*, (H) *Kluyveromyces*, (I) *Saccharomycetaceae*. n = 6; Data are presented as mean  $\pm$  standard deviation (SD). \* $p < 0.05$ , \*\* $p < 0.01$ , \*\*\* $p < 0.001$  according to Wilcoxon rank sum test. CK, control fed mice; EtOH, ethanol fed mice; Km, ethanol + *K. marxianus* fed mice.

**Table S1** Ingredients and calories of Lieber DeCarli (LDC) diet

| Ingredient         | LDC diet (L10016A) |      | Control diet |      | Ethanol diet |      |
|--------------------|--------------------|------|--------------|------|--------------|------|
|                    | g                  | kcal | g            | kcal | g            | kcal |
| Casein             | 41.4               | 166  | 41.4         | 166  | 41.4         | 166  |
| DL-Methionine      | 0.3                | 1    | 0.3          | 1    | 0.3          | 1    |
| L-Cystine          | 0.5                | 2    | 0.5          | 2    | 0.5          | 2    |
| Maltodextrin       | 25.6               | 102  | 25.6+89.6    | 461  | 25.6+ (--)   | --   |
| Cellulose          | 10                 | 0    | 10           | 0    | 10           | 0    |
| Xantham Gum        | 3                  | 0    | 3            | 0    | 3            | 0    |
| Corn oil           | 8.5                | 77   | 8.5          | 77   | 8.5          | 77   |
| Olive oil          | 28.4               | 256  | 28.4         | 256  | 28.4         | 256  |
| Safflower oil      | 2.7                | 24   | 2.7          | 24   | 2.7          | 24   |
| Minerals           | 8.75               | 0    | 8.75         | 0    | 8.75         | 0    |
| Vitamins           | 2.5                | 9    | 2.5          | 9    | 2.5          | 9    |
| Choline Bitartrate | 0.53               | 0    | 0.53         | 0    | 0.53         | 0    |
| Ethanol, 100%      |                    |      |              |      | 1% up to 4%  | --   |
| H <sub>2</sub> O   |                    |      | 778.22       |      | --           |      |
| Total              | 132.18             | 637  | 1000         | 996  | 1000         | 996  |

**Table S2** Primer sequences used in qRT-PCR for cytokine mRNA quantification<sup>1,2</sup>

| Gene    | Primer sequence (5'→3')      |
|---------|------------------------------|
| β-actin | F: GCTCTGGCTCCTAGCACCAT      |
|         | R: GCCACCGATCCACACAGAGT      |
| IL-6    | F: GTTGCCTTCTTGGGACTGATGCT   |
|         | R: GCCTCCGACTTGTGAAGTGGTATAG |
| IL-1β   | F: GCAACTGTTCTGAACTCAACT     |
|         | R: ATCTTTTGGGGTCCGTCAACT     |
| TNF-α   | F: CCCTCACACTCAGATCATCTTCT   |
|         | R: GCTACGACGTGGGCTACAG       |

#### Reference

1. X. Zeng, X. Li, Y. Yue, X. Wang, H. Chen, Y. Gu, H. Jia, Y. He, Y. Yuan and T. Yue, Ameliorative Effect of *Saccharomyces cerevisiae* JKSP39 on *Fusobacterium nucleatum* and Dextran Sulfate Sodium-Induced Colitis Mouse Model, *J Agric Food Chem*, 2022, **70**, 14179-14192.
2. X. Zeng, H. Jia, Y. Shi, K. Chen, Z. Wang, Z. Gao, Y. Yuan and T. Yue, *Lactobacillus kefirifaciens* JKSP109 and *Saccharomyces cerevisiae* JKSP39 isolated from Tibetan kefir grain co-alleviated AOM/DSS induced inflammation and colorectal carcinogenesis, *Food & Function*, 2022, **13**, 6947-6961.
