# Supplementary figures and images for: Kluyveromyces marxianus supplementation ameliorates alcohol-induced liver injury associated with the modulation of gut microbiota in mice
Source: Royal Society of Chemistry journal article supplement (doi:10.1039/d3fo01796f), 2023-01-01

### TLR4

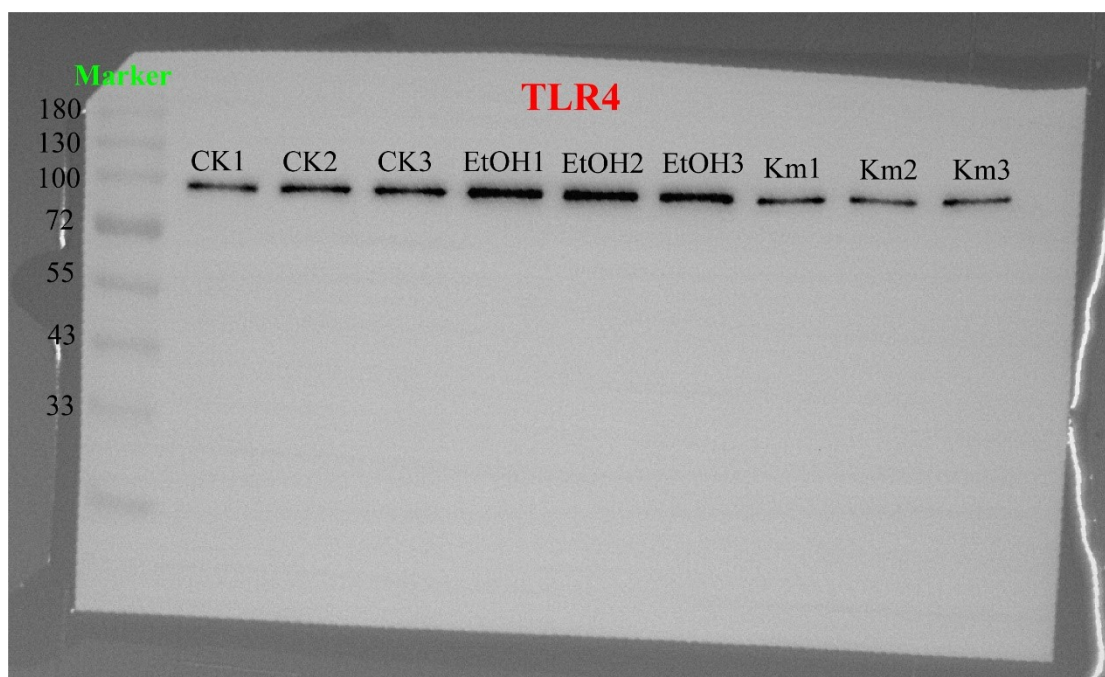

### MyD88

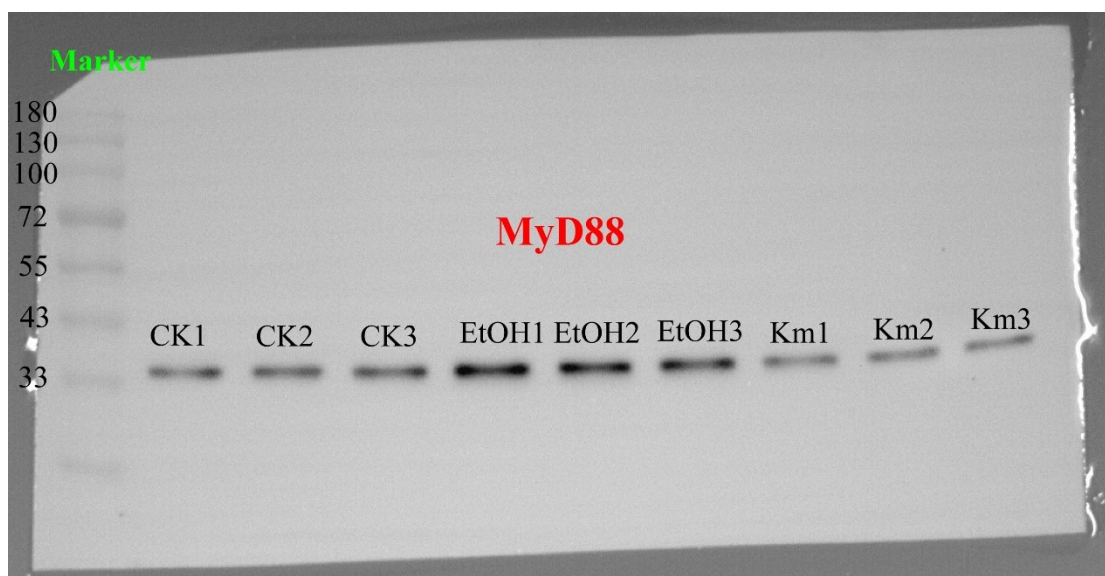

## NF-κB

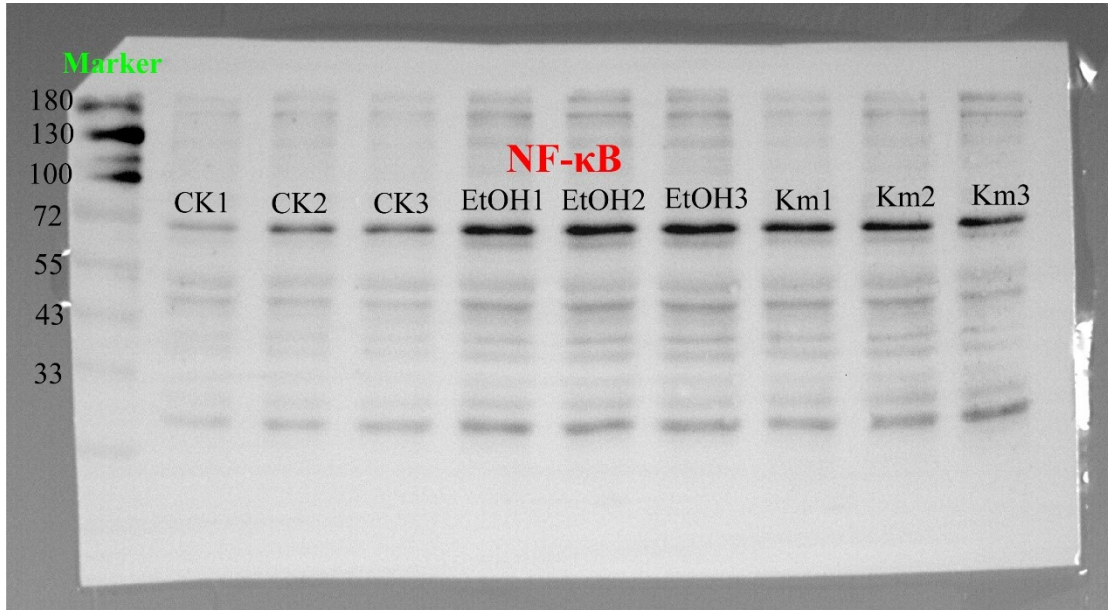

## Nrf2

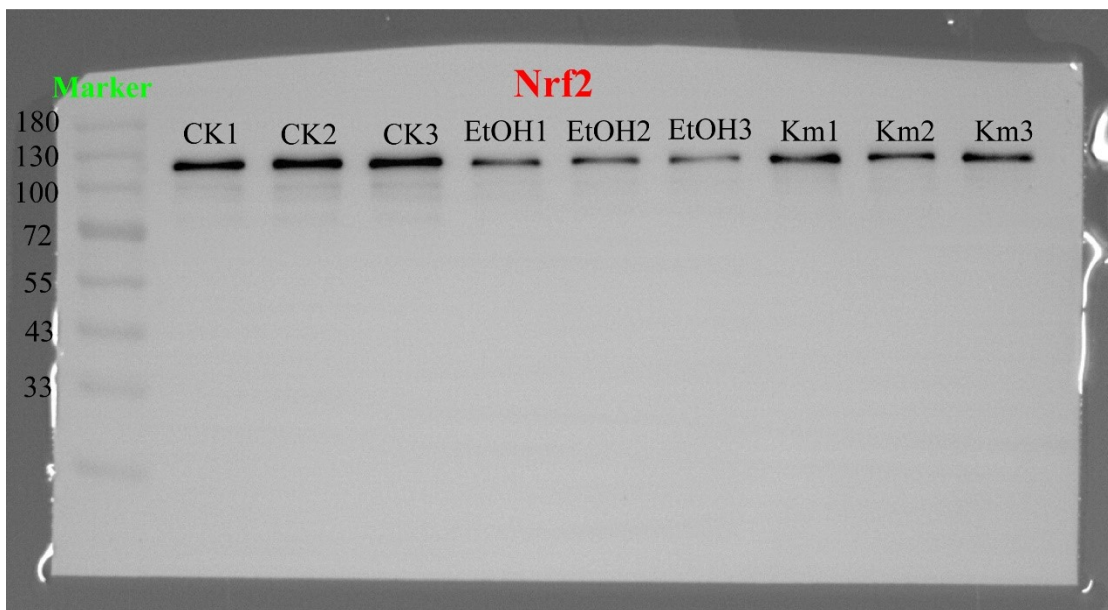

# $\beta$ -actin

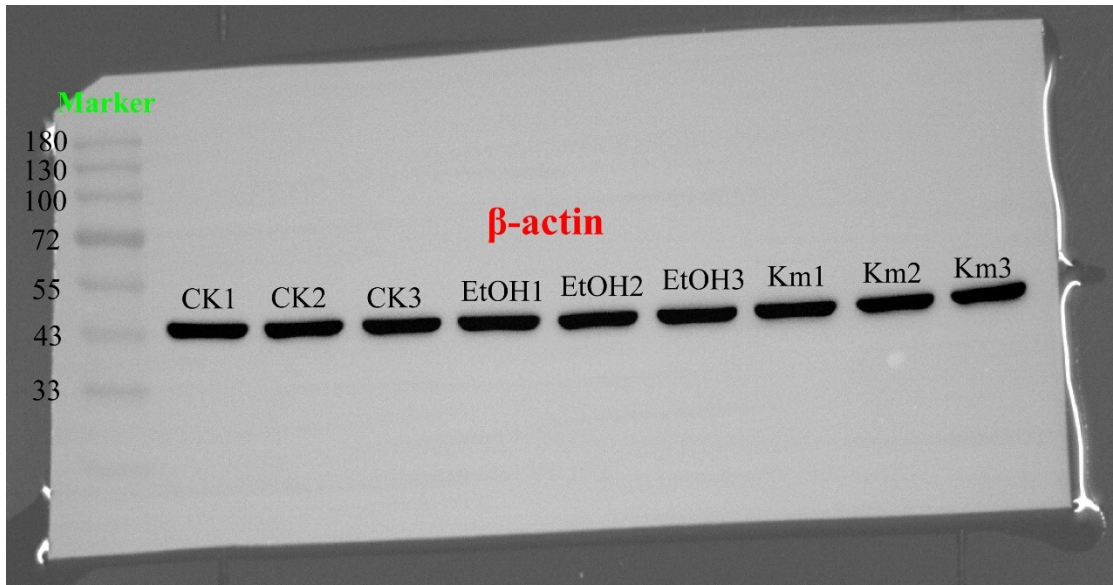

Supplement: d3fo01796f3.pdf [file d3fo01796f3.pdf]
